# Supplementary material for: Development of an RNAi-based microalgal larvicide for the control of Aedes aegypti
Source: PubMed Central journal article supplement (PMC8344188; doi:10.1186/s13071-021-04885-1), 2021-08-06

**Additional file: Figure S1.** The schematic diagram of coding region of 3-hydroxykynurenine transaminase (3HKT) in *Aedes aegypti*. The yellow part indicates the area silenced by RNAi, which is located in the 3HKT coding region between 329 and 648, in the corresponding aminotransferase (class V) domain.

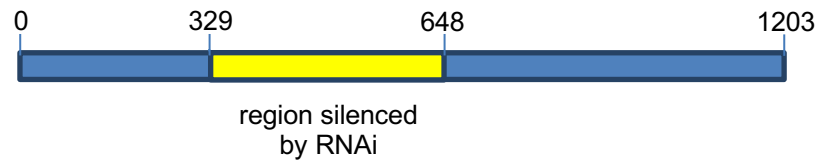

Supplement: 13071_2021_4885_MOESM1_ESM.pdf [file 13071_2021_4885_MOESM1_ESM.pdf]
