# Supplementary material for: Development of an RNAi-based microalgal larvicide for the control of Aedes aegypti
Source: PubMed Central journal article supplement (PMC8344188; doi:10.1186/s13071-021-04885-1), 2021-08-06

**Additional file 2: Figure S2.** Tissue changes in *Aedes aegypti* larvae fed with 3HKT RNAi transgenic *Chlamydomonas*. a, b, c: The body of the larva fed with non-transgenic *C. reinhardtii* strain CC425; d-i: The tissues of larva fed with 3HKT RNAi transgenic *Chlamydomonas* 3HKT-A9. Larvae fed with *C. reinhardtii* CC425 had intact epidermis, thick and neat arranged muscles, and clear brush edge. Their midgut was normal, with an intact intestinal lumen (a, b, c). The integumentary system of the larvae fed with 3HKT RNAi transgenic *Chlamydomonas* was damaged, and their brush edge turned fuzzy. Their muscles were unevenly distributed, disordered. The midgut was characterized by enlarged intestinal cavity (d-i).

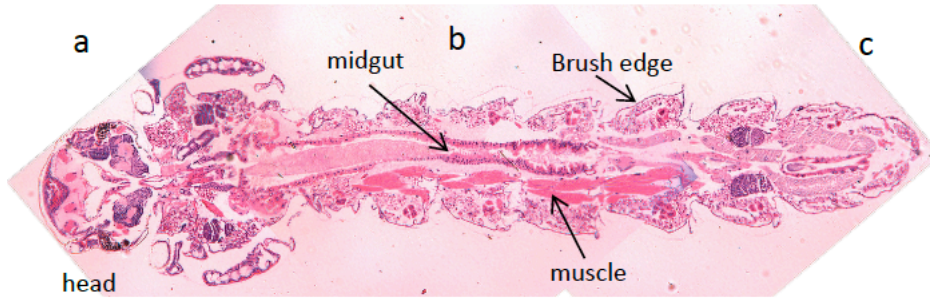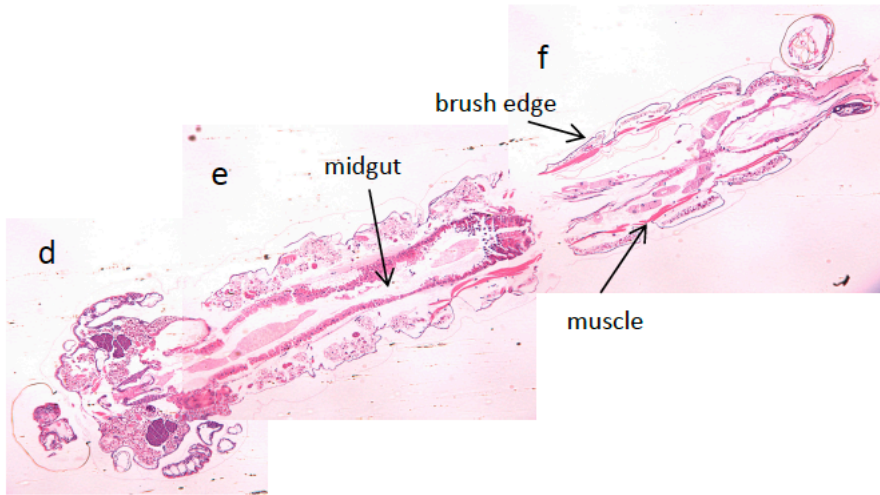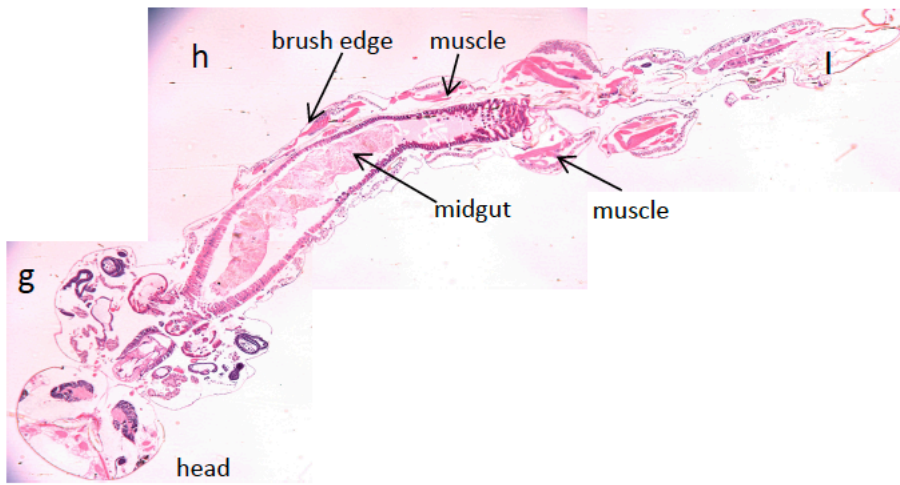

Supplement: 13071_2021_4885_MOESM2_ESM.pdf [file 13071_2021_4885_MOESM2_ESM.pdf]
